# Supplementary material for: Massively parallel tag sequencing reveals the complexity of anaerobic marine protistan communities
Source: PubMed Central journal article supplement (PMC2777867; doi:10.1186/1741-7007-7-72), 2009-11-03

## Supplemental Figure S2

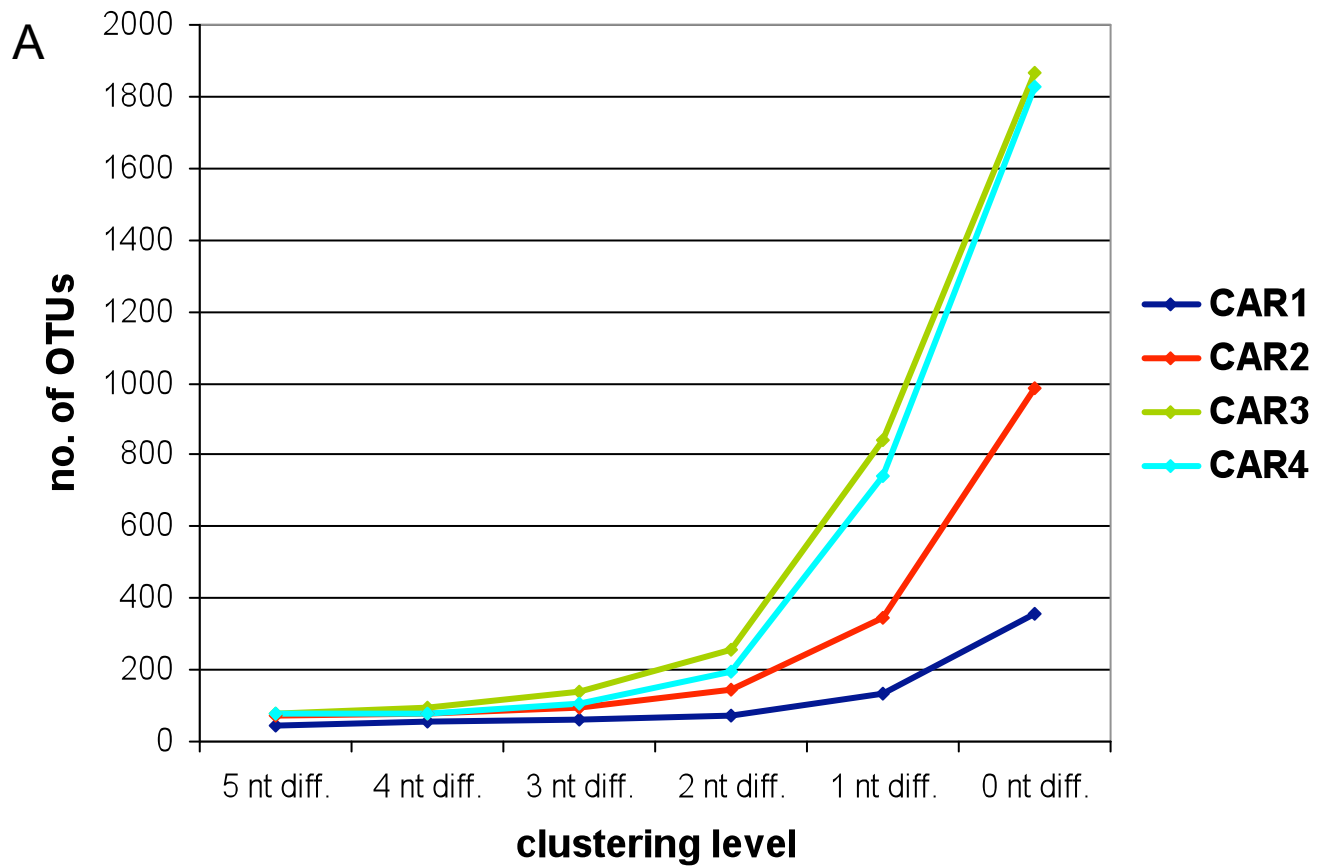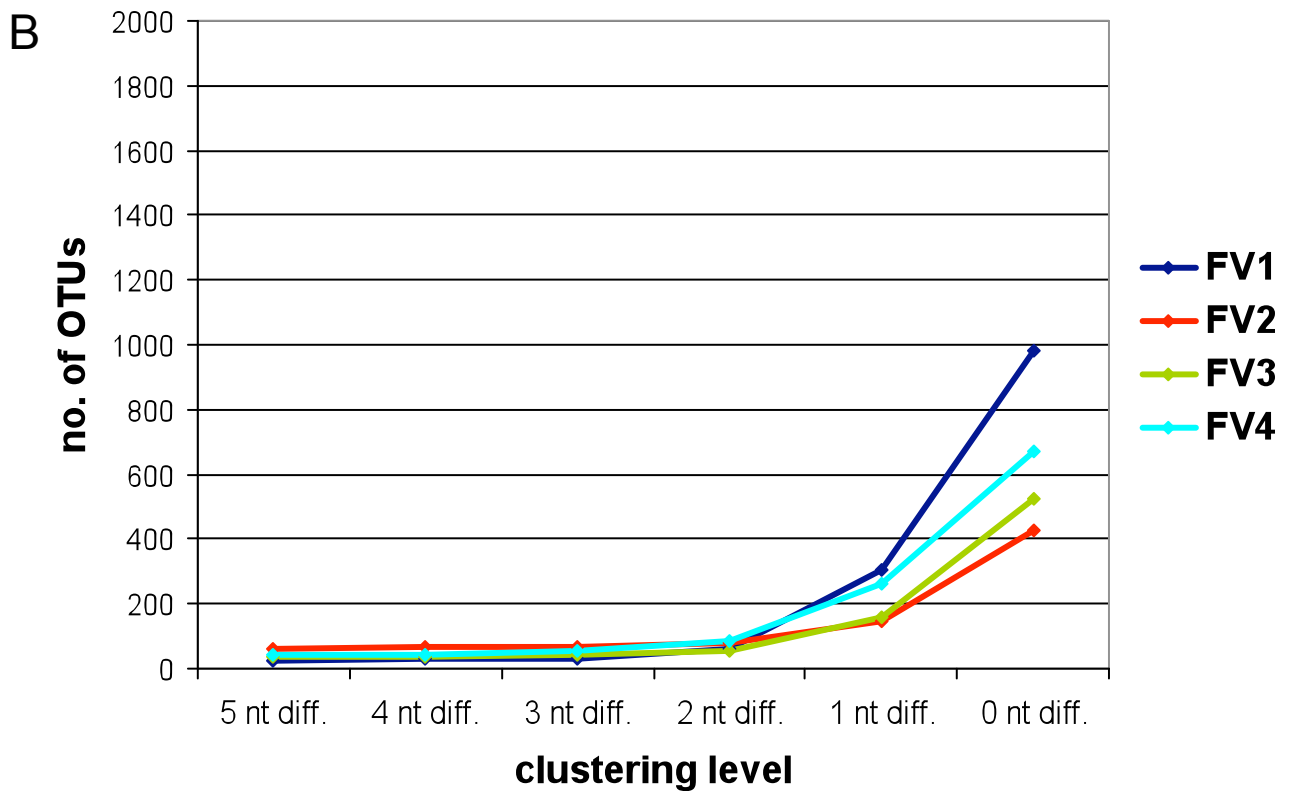

Supplement: 1741-7007-7-72-S3.pdf [file 1741-7007-7-72-S3.pdf]
